# Supplementary material for: One Step Forward with Dry Surface Biofilm (DSB) of Staphylococcus aureus: TMT-Based Quantitative Proteomic Analysis Reveals Proteomic Shifts between DSB and Hydrated Biofilm
Source: MDPI journal article supplement (doi:10.3390/ijms232012238), 2022-10-13
Supplement: s1 [file s1]

**Table S1:** Functional classification of the significantly upregulated common proteins between hydrated biofilm and DSB compared with planktonic culture (p <0.05). \*FC denotes fold change; \*\* CM denotes Cytoplasmic Membrane.

| Accession ID | Protein Name                                  | Gene Name             | Hydrated biofilm (FC)* | DSB (FC)* | Protein Pathways                                                                                                                                                                                                                                                         | Subcellular Localization |
|--------------|-----------------------------------------------|-----------------------|------------------------|-----------|--------------------------------------------------------------------------------------------------------------------------------------------------------------------------------------------------------------------------------------------------------------------------|--------------------------|
| AIO22223.1   | type II secretion protein                     | SA2371                | 3.59                   | 2.46      |                                                                                                                                                                                                                                                                          | Unknown                  |
| AIO21382.1   | isocitrate dehydrogenase                      | icd citC<br>SA1517    | 3.06                   | 2.17      | Metabolic pathways, Biosynthesis of secondary metabolites, Biosynthesis of amino acids, Biosynthesis of antibiotics, Microbial metabolism in diverse environments, Carbon metabolism, 2-Oxocarboxylic acid metabolism, Glutathione metabolism, Citrate cycle (TCA cycle) | Cytoplasmic              |
| AIO20590.1   | membrane protein                              | SA0870                | 2.62                   | 2.04      |                                                                                                                                                                                                                                                                          | CM**                     |
| AIO22305.1   | hypothetical protein KQ76_13935               | SA2451                | 5.52                   | 4.40      |                                                                                                                                                                                                                                                                          | Unknown                  |
| OOC90965.1   | glutamine ABC transporter ATP-binding protein | SA1674                | 2.83                   | 2.30      |                                                                                                                                                                                                                                                                          | CM                       |
| AIO20668.1   | phosphoribosylformylglycin amidine synthase   | purL<br>SACOL107<br>8 | 2.45                   | 2.03      | Metabolic pathways, Biosynthesis of secondary metabolites, Purine metabolism, Biosynthesis of antibiotics                                                                                                                                                                | Cytoplasmic              |
| AIO20812.1   | DNA-directed RNA polymerase subunit omega     | rpoZ<br>SA1053        | 3.74                   | 3.16      | Metabolic pathways, Pyrimidine metabolism, Purine metabolism, RNA polymerase,                                                                                                                                                                                            | Cytoplasmic              |

|            |                                                             |                       |      |      |                                                                                                                                                                                                              |             |
|------------|-------------------------------------------------------------|-----------------------|------|------|--------------------------------------------------------------------------------------------------------------------------------------------------------------------------------------------------------------|-------------|
| AIO20535.1 | argininosuccinate lyase                                     | argH<br>SA0821        | 2.43 | 2.06 | Metabolic pathways,<br>Biosynthesis of secondary<br>metabolites, Biosynthesis of<br>amino acids, Biosynthesis of<br>antibiotics, Alanine,<br>aspartate and glutamate<br>metabolism, Arginine<br>biosynthesis | Cytoplasmic |
| AIO20780.1 | cell division protein MraZ                                  | mraZ<br>SA1021        | 2.58 | 2.21 |                                                                                                                                                                                                              | Cytoplasmic |
| AIO19852.1 | branched-chain amino acid<br>transporter II carrier protein | SA0180                | 3.81 | 3.27 |                                                                                                                                                                                                              | CM          |
| AIO20178.1 | dihydropteroate synthase                                    | folP<br>SA0472        | 3.28 | 2.81 | Metabolic pathways, Folate<br>biosynthesis                                                                                                                                                                   | CM          |
| AIO20178.1 | dihydropteroate synthase                                    | folP<br>SA0472        | 3.28 | 2.81 | Metabolic pathways, Folate<br>biosynthesis                                                                                                                                                                   | Cytoplasmic |
| AIO21773.1 | membrane protein                                            | SA1937                | 3.20 | 2.82 |                                                                                                                                                                                                              | CM          |
| AIO21226.1 | octanoyltransferase                                         | lipM<br>SA1363        | 2.68 | 2.38 | Metabolic pathways, Lipoic<br>acid metabolism                                                                                                                                                                | Cytoplasmic |
| AIO20979.1 | sodium:alanine symporter                                    | alsT                  | 2.67 | 2.42 |                                                                                                                                                                                                              | CM          |
| AIO20958.1 | guanosine 5'-<br>monophosphate<br>oxidoreductase            | guaC<br>SACOL137<br>1 | 3.28 | 2.97 | Purine metabolism                                                                                                                                                                                            | Cytoplasmic |
| AIO21819.1 | hypothetical protein<br>KQ76_11385                          | SA1986                | 3.27 | 2.96 |                                                                                                                                                                                                              | CM          |
| AIO22040.1 | formate/nitrite transporter                                 | SACOL240<br>1         | 2.56 | 2.33 |                                                                                                                                                                                                              | CM          |
| AIO21727.1 | membrane protein                                            | yidC<br>SA1893        | 2.46 | 2.27 | Protein export, Bacterial<br>secretion system, Quorum<br>sensing                                                                                                                                             | CM          |
| AIO21864.1 | 50S ribosomal protein L18                                   | rplR<br>SA2032        | 2.33 | 2.19 | Ribosome                                                                                                                                                                                                     | Cytoplasmic |

|            |                                                        |                       |      |      |                                                                                    |                      |
|------------|--------------------------------------------------------|-----------------------|------|------|------------------------------------------------------------------------------------|----------------------|
| AIO19795.1 | acetoin reductase                                      | butA<br>SA0122        | 2.49 | 2.35 | Butanoate metabolism                                                               | Cytoplasmic          |
| AIO22226.1 | fructosamine kinase                                    | SA2374                | 2.71 | 2.55 |                                                                                    | Cytoplasmic          |
| AIO21765.1 | CTP synthetase                                         | pyrG ctrA<br>SA1929   | 2.32 | 2.24 | Metabolic pathways,<br>Pyrimidine metabolism                                       | Cytoplasmic          |
| AIO21934.1 | octopine dehydrogenase                                 | SA2095                | 2.20 | 2.13 |                                                                                    | Cytoplasmic          |
| AIO20806.1 | orotidine 5'-phosphate<br>decarboxylase                | pyrF<br>SA1047        | 2.54 | 2.49 | Metabolic pathways,<br>Pyrimidine metabolism                                       | Cytoplasmic          |
| AIO21333.1 | ATP-dependent DNA<br>helicase RuvB                     | ruvB<br>SACOL169<br>6 | 2.55 | 2.50 | Homologous recombination                                                           | Cytoplasmic<br>9.98  |
| AIO21826.1 | PTS system lactose-specific<br>transporter subunit IIA | lacF<br>SA1993        | 2.36 | 2.32 | Metabolic pathways,<br>Galactose metabolism,<br>Phosphotransferase system<br>(PTS) | Cytoplasmic<br>10.01 |

|            |                                                                 |                     |      |      |                                                                                                                                                                                                                                                               |             |
|------------|-----------------------------------------------------------------|---------------------|------|------|---------------------------------------------------------------------------------------------------------------------------------------------------------------------------------------------------------------------------------------------------------------|-------------|
| AIO20163.1 | ribose-phosphate<br>pyrophosphokinase                           | prs SA0458          | 2.81 | 2.79 | Metabolic pathways,<br>Biosynthesis of secondary<br>metabolites, Biosynthesis of<br>amino acids, Biosynthesis of<br>antibiotics, Purine<br>metabolism, Microbial<br>metabolism in diverse<br>environments, Carbon<br>metabolism, Pentose<br>phosphate pathway | Cytoplasmic |
| AIO21316.1 | hypothetical protein<br>KQ76_08470                              | SAS049              | 2.21 | 2.21 |                                                                                                                                                                                                                                                               | Unknown     |
| AIO21860.1 | preprotein translocase<br>subunit SecY                          | secY<br>SA2028      | 2.15 | 2.16 | Protein export, Bacterial<br>secretion system, Quorum<br>sensing                                                                                                                                                                                              | CM          |
| AIO21768.1 | pantothenate kinase                                             | coaW<br>SA1932      | 2.01 | 2.03 | Metabolic pathways,<br>Pantothenate and CoA<br>biosynthesis                                                                                                                                                                                                   | Unknown     |
| AIO20718.1 | glycerophosphodiester<br>phosphodiesterase                      | SA0969              | 2.38 | 2.45 | Glycerophospholipid<br>metabolism                                                                                                                                                                                                                             | Cytoplasmic |
| AIO21539.1 | pseudouridine synthase                                          | SA1668              | 2.50 | 2.58 |                                                                                                                                                                                                                                                               | Cytoplasmic |
| AIO20864.1 | uridylate kinase                                                | pyrH smbA<br>SA1101 | 2.07 | 2.20 | Metabolic pathways,<br>Pyrimidine metabolism                                                                                                                                                                                                                  | Cytoplasmic |
| AIO20697.1 | spermidine/putrescine ABC<br>transporter ATP-binding<br>protein | potA<br>SA0950      | 2.30 | 2.46 | ABC transporters                                                                                                                                                                                                                                              | CM          |
| AIO21307.1 | hypothetical protein<br>KQ76_08425                              | SA1443              | 2.10 | 2.26 |                                                                                                                                                                                                                                                               | Cytoplasmic |
| AIO21769.1 | hypothetical protein<br>KQ76_11075                              | SA1933              | 2.10 | 2.26 |                                                                                                                                                                                                                                                               | Cytoplasmic |

|            |                                                          |                       |      |      |                                                                                                                                                                                            |             |
|------------|----------------------------------------------------------|-----------------------|------|------|--------------------------------------------------------------------------------------------------------------------------------------------------------------------------------------------|-------------|
| AIO20807.1 | orotate<br>phosphoribosyltransferase                     | pyrE<br>SA1048        | 2.13 | 2.30 | Metabolic pathways,<br>Pyrimidine metabolism                                                                                                                                               | Cytoplasmic |
| AIO21210.1 | 2-oxoisovalerate<br>dehydrogenase                        | SACOL156<br>1         | 3.11 | 3.36 | Metabolic pathways,<br>Biosynthesis of secondary<br>metabolites, Biosynthesis of<br>antibiotics, Propanoate<br>metabolism, Valine, leucine<br>and isoleucine degradation                   | Cytoplasmic |
| AIO21335.1 | ACT domain-containing<br>protein                         | SA1469                | 3.27 | 3.59 | Metabolic pathways,<br>Biosynthesis of secondary<br>metabolites, Biosynthesis of<br>amino acids, Biosynthesis of<br>antibiotics, Phenylalanine,<br>tyrosine and tryptophan<br>biosynthesis | Cytoplasmic |
| AIO22278.1 | amino acid APC transporter                               | arcD                  | 2.23 | 2.47 |                                                                                                                                                                                            | CM          |
| AIO20787.1 | cell division protein FtsA                               | ftsA<br>SA1028        | 2.94 | 3.29 |                                                                                                                                                                                            | Cytoplasmic |
| AIO21825.1 | PTS system lactose-specific<br>transporter subunits IICB | lacE<br>SACOL218<br>1 | 2.27 | 2.54 | Metabolic pathways,<br>Phosphotransferase system<br>(PTS), Galactose metabolism                                                                                                            | CM          |
| AIO21878.1 | 50S ribosomal protein L23                                | rplW<br>SA2045        | 2.15 | 2.41 | Ribosome                                                                                                                                                                                   | Cytoplasmic |
| AIO20778.1 | hypothetical protein<br>KQ76_05635                       | SA1019                | 2.41 | 2.71 |                                                                                                                                                                                            | Unknown     |
| AIO21910.1 | molybdenum ABC<br>transporter permease                   | modB                  | 2.57 | 2.93 | ABC transporters                                                                                                                                                                           | CM          |
| AIO21879.1 | 50S ribosomal protein L4                                 | rplD<br>SA2046        | 2.03 | 2.33 | Ribosome                                                                                                                                                                                   | Unknown     |
| AIO20968.1 | exonuclease                                              | sbcD<br>SA1180        | 2.36 | 2.73 |                                                                                                                                                                                            | Cytoplasmic |

|            |                                                       |                       |      |      |                                                                                                                       |             |
|------------|-------------------------------------------------------|-----------------------|------|------|-----------------------------------------------------------------------------------------------------------------------|-------------|
| AIO22176.1 | PTS system glucose-specific transporter subunit IICBA | glcB<br>SACOL255<br>2 | 2.07 | 2.40 | Phosphotransferase system (PTS), Amino sugar and nucleotide sugar metabolism, Glycolysis / Gluconeogenesis            | CM          |
| AIO22234.1 | pantoate--beta-alanine ligase                         | panC<br>SACOL261<br>4 | 2.91 | 3.42 | Metabolic pathways, Biosynthesis of secondary metabolites, Pantothenate and CoA biosynthesis, beta-Alanine metabolism | Cytoplasmic |
| AIO21337.1 | 50S ribosomal protein L27                             | rpmA<br>SA1471        | 2.64 | 3.12 | Ribosome                                                                                                              | Cytoplasmic |
| AIO20205.1 | 50S ribosomal protein L10                             | rplJ SA0497           | 2.16 | 2.69 | Ribosome                                                                                                              | Cytoplasmic |
| AIO20817.1 | peptide deformylase                                   | SA1058                | 2.10 | 2.66 |                                                                                                                       | Cytoplasmic |
| AIO19749.1 | hypothetical protein KQ76_00135                       |                       | 2.73 | 3.48 |                                                                                                                       | Cytoplasmic |
| AIO20985.1 | LytR family transcriptional regulator                 | msrR<br>SA1195        | 2.13 | 2.75 |                                                                                                                       | CM          |
| AIO21707.1 | 4'-phosphopantetheinyl transferase                    | acpS dpj<br>SA1875    | 2.37 | 3.18 | Pantothenate and CoA biosynthesis                                                                                     |             |
| OOC94735.1 | hypothetical protein BWO94_01050                      |                       | 3.63 | 4.91 |                                                                                                                       | Unknown     |
| AIO20937.1 | hypothetical protein KQ76_06475                       | SAS040                | 2.84 | 3.94 |                                                                                                                       | Unknown     |
| AIO20620.1 | hypothetical protein KQ76_04815                       | SACOL158<br>5         | 2.20 | 3.15 |                                                                                                                       | Unknown     |
| AIO20395.1 | lipid kinase                                          | SACOL078<br>7         | 2.05 | 3.03 |                                                                                                                       | Unknown     |
| AIO21848.1 | 50S ribosomal protein L13                             | rplM<br>SA2017        | 2.14 | 3.28 | Ribosome                                                                                                              | Unknown     |

**Table S2:** Functional classification of the significantly downregulated common proteins between hydrated biofilm and DSB compared with planktonic culture (p <0.05). \*FC denotes fold change; \*\* CM denotes Cytoplasmic Membrane.

| Accession ID | Protein Name                                                           | Gene Name            | Hydrated<br>biofilm<br>(FC)* | DSB<br>(FC)* | Protein Pathways                                                                                                                                          | Subcellular<br>Localization |
|--------------|------------------------------------------------------------------------|----------------------|------------------------------|--------------|-----------------------------------------------------------------------------------------------------------------------------------------------------------|-----------------------------|
| AIO20700.1   | spermidine/putrescine<br>ABC transporter substrate-<br>binding protein | potD                 | 0.08                         | 0.04         | ABC transporters                                                                                                                                          | Unknown                     |
| AIO22060.1   | gamma-hemolysin subunit<br>A                                           | hlgC SA2208          | 0.35                         | 0.22         | <i>Staphylococcus aureus</i> infection                                                                                                                    | Extracellular               |
| AIO20660.1   | chitinase                                                              | SA0914               | 0.09                         | 0.06         |                                                                                                                                                           | Unknown                     |
| AIO20463.1   | thermonuclease                                                         | nuc<br>SACOL0860     | 0.16                         | 0.12         |                                                                                                                                                           | Extracellular               |
| AIO21509.1   | serine protease                                                        | spIC<br>SACOL1867    | 0.28                         | 0.20         |                                                                                                                                                           | Extracellular               |
| AIO20279.1   | hypothetical protein<br>KQ76_03005                                     | SA0570               | 0.48                         | 0.36         | Metabolic pathways, Glycerolipid<br>metabolism                                                                                                            | Unknown                     |
| AIO19987.1   | lipase                                                                 | lip2 geh<br>SA0309   | 0.14                         | 0.10         |                                                                                                                                                           | Extracellular               |
| AIO20583.1   | hypothetical protein<br>KQ76_04610                                     | SACOL1009            | 0.46                         | 0.35         |                                                                                                                                                           | CM**                        |
| AIO20651.1   | mannosyl-glycoprotein<br>endo-beta-N-<br>acetylglucosamidase           | atl nag<br>SACOL1062 | 0.24                         | 0.18         | Metabolic pathways, Microbial<br>metabolism in diverse<br>environments, Biosynthesis of<br>secondary metabolites, Porphyrin<br>and chlorophyll metabolism | Extracellular               |
| AIO21353.1   | delta-aminolevulinic acid<br>dehydratase                               | hemB<br>SA1492       | 0.27                         | 0.21         |                                                                                                                                                           | Cytoplasmic                 |

|            |                                            |                           |      |      |                                        |               |
|------------|--------------------------------------------|---------------------------|------|------|----------------------------------------|---------------|
| AIO20960.1 | secretion protein                          | SACOL1373                 | 0.47 | 0.37 |                                        | Unknown       |
| AIO21128.1 | hypothetical protein<br>KQ76_07495         |                           | 0.35 | 0.28 |                                        | Cytoplasmic   |
| OOC94758.1 | alpha/beta hydrolase                       | SA1990                    | 0.33 | 0.26 |                                        | Unknown       |
| AIO20644.1 | cysteine protease                          | sspB<br>SACOL1056         | 0.11 | 0.09 |                                        | Extracellular |
| AIO19870.1 | peptidase M23                              | SA0205                    | 0.19 | 0.16 |                                        | Extracellular |
| AIO20093.1 | superantigen-like protein                  | set11                     | 0.33 | 0.28 | <i>Staphylococcus aureus</i> infection | Extracellular |
| AIO20534.1 | glycerophosphodiester<br>phosphodiesterase | glpQ                      | 0.22 | 0.18 |                                        | Unknown       |
| AIO20738.1 | phenylalanyl-tRNA<br>synthase subunit beta | pheT<br>SA0986            | 0.38 | 0.33 | Aminoacyl-tRNA biosynthesis            | Cytoplasmic   |
| AIO22292.1 | adhesin                                    | sasF<br>SACOL2668         | 0.43 | 0.37 |                                        | Cellwall      |
| AIO21549.1 | Fur family transcriptional<br>regulator    | perR<br>SACOL1919         | 0.48 | 0.42 |                                        | Cytoplasmic   |
| AIO21667.1 | delta-hemolysin                            | hld<br>SA1841.1<br>SAS065 | 0.03 | 0.03 | Quorum sensing                         | Unknown       |
| AIO20100.1 | hypothetical protein<br>KQ76_01960         | SA0395                    | 0.14 | 0.12 |                                        | Unknown       |
| AIO20951.1 | HAD family hydrolase                       | SA1167                    | 0.43 | 0.37 |                                        | Cytoplasmic   |
| AIO20623.1 | conjugal transfer protein                  | SACOL1582                 | 0.42 | 0.37 |                                        | Unknown       |
| AIO22349.1 | hypothetical protein<br>KQ76_14165         |                           | 0.30 | 0.27 |                                        | Unknown       |
| AIO20056.1 | hypothetical protein<br>KQ76_01725         |                           | 0.10 | 0.09 |                                        | CM            |



|            |                                                       |                      |      |      |                                                                                                                                                                                                                                                                             |               |
|------------|-------------------------------------------------------|----------------------|------|------|-----------------------------------------------------------------------------------------------------------------------------------------------------------------------------------------------------------------------------------------------------------------------------|---------------|
| AIO21298.1 | acetyl-CoA carboxylase<br>biotin carboxylase subunit  | SA1434               | 0.41 | 0.36 | Metabolic pathways, Microbial<br>metabolism in diverse<br>environments, Biosynthesis of<br>secondary metabolites,<br>Biosynthesis of antibiotics, Carbon<br>metabolism, Fatty acid<br>metabolism, Propanoate<br>metabolism, Pyruvate metabolism,<br>Fatty acid biosynthesis | Cytoplasmic   |
| AIO19780.1 | MarR family<br>transcriptional regulator              | sarS sarH1<br>SA0108 | 0.45 | 0.40 |                                                                                                                                                                                                                                                                             | Cytoplasmic   |
| AIO20712.1 | pyruvate carboxylase                                  | pyc<br>SACOL1123     | 0.50 | 0.45 | Metabolic pathways, Pyruvate<br>metabolism, Microbial metabolism<br>in diverse environments,<br>Biosynthesis of amino acids,<br>Citrate cycle (TCA cycle), Carbon<br>metabolism                                                                                             | Cytoplasmic   |
| AIO19770.1 | 1-phosphatidylinositol<br>phosphodiesterase           | plc                  | 0.19 | 0.17 | Inositol phosphate metabolism                                                                                                                                                                                                                                               | Extracellular |
| AIO22290.1 | N-acetylmuramoyl-L-<br>alanine amidase                | SACOL2666            | 0.14 | 0.12 |                                                                                                                                                                                                                                                                             | Extracellular |
| AIO20332.1 | peptidase M23B                                        | SA0620               | 0.14 | 0.13 |                                                                                                                                                                                                                                                                             | Cell wall     |
| AIO20756.1 | formyl peptide receptor-<br>like 1 inhibitory protein | flr SA1001           | 0.35 | 0.32 | <i>Staphylococcus aureus</i> infection                                                                                                                                                                                                                                      | Unknown       |
| AIO21349.1 | DNA-3-methyladenine<br>glycosylase                    | tag                  | 0.40 | 0.36 | Base excision repair                                                                                                                                                                                                                                                        | Unknown       |
| AIO21997.1 | LytTR family<br>transcriptional regulator             | SA2153               | 0.43 | 0.40 |                                                                                                                                                                                                                                                                             | Unknown       |

|            |                                               |                 |      |      |                                                                                                                   |               |
|------------|-----------------------------------------------|-----------------|------|------|-------------------------------------------------------------------------------------------------------------------|---------------|
| AIO21607.1 | nitric oxide synthase                         | nos SA1730      | 0.44 | 0.40 | Metabolic pathways, Biosynthesis of secondary metabolites, Arginine biosynthesis, Arginine and proline metabolism | Cytoplasmic   |
| AIO20419.1 | DegV domain-containing protein                | SACOL0812       | 0.49 | 0.45 |                                                                                                                   | Cytoplasmic   |
| AIO21983.1 | esterase                                      | SA2140          | 0.48 | 0.44 |                                                                                                                   | Cytoplasmic   |
| AIO22180.1 | LysR family transcriptional regulator         | SA2330          | 0.34 | 0.32 |                                                                                                                   | Cytoplasmic   |
| AIO20126.1 | N-acetylmuramoyl-L-alanine amidase            | sle1 aaa SA0423 | 0.29 | 0.27 |                                                                                                                   | Cellwall      |
| AIO21449.1 | leucyl-tRNA synthetase                        | leuS SA1579     | 0.36 | 0.34 | Aminoacyl-tRNA biosynthesis                                                                                       | Cytoplasmic   |
| AIO20739.1 | ribonuclease HIII                             | rnhC SACOL1150  | 0.22 | 0.20 | DNA replication                                                                                                   | Unknown       |
| AIO20704.1 | hypothetical protein KQ76_05255               | SA0957          | 0.49 | 0.46 |                                                                                                                   | Cytoplasmic   |
| AIO20387.1 | glycerol phosphate lipoteichoic acid synthase | ltaS SA0674     | 0.15 | 0.14 | Metabolic pathways, Glycerolipid metabolism                                                                       | CM            |
| OOC91307.1 | hypothetical protein BWO94_08325              | SA1008          | 0.50 | 0.47 |                                                                                                                   | Unknown       |
| AIO21583.1 | ferritin                                      | ftnA SA1709     | 0.44 | 0.42 |                                                                                                                   | Cytoplasmic   |
| AIO21618.1 | hypothetical protein KQ76_10250               | SAS056          | 0.46 | 0.44 |                                                                                                                   |               |
| AIO19947.1 | staphyloxanthin biosynthesis protein          | SACOL0270       | 0.13 | 0.12 |                                                                                                                   | Extracellular |
| AIO21246.1 | penicillin-binding protein                    | pbp3            | 0.36 | 0.35 | Metabolic pathways, beta-Lactam resistance, Peptidoglycan biosynthesis                                            | CM            |
| AIO20202.1 | antitermination protein NusG                  | nusG SA0494     | 0.46 | 0.44 |                                                                                                                   | Cytoplasmic   |

|            |                                             |                       |      |      |                                                                                                |               |
|------------|---------------------------------------------|-----------------------|------|------|------------------------------------------------------------------------------------------------|---------------|
| OOC94232.1 | aureolysin                                  | aur<br>SACOL2659      | 0.32 | 0.30 | <i>Staphylococcus aureus</i> infection,<br>Cationic antimicrobial peptide<br>(CAMP) resistance | Extracellular |
| AIO19779.1 | peptigoglycan-binding<br>protein LysM       | spa<br>SACOL0095      | 0.16 | 0.15 | <i>Staphylococcus aureus</i> infection                                                         | Cellwall      |
| AIO20863.1 | elongation factor Ts                        | tsf<br>SACOL1276      | 0.36 | 0.35 |                                                                                                | Cytoplasmic   |
| AIO22317.1 | lipase                                      | lip1 SA2463           | 0.20 | 0.19 | Metabolic pathways, Glycerolipid<br>metabolism                                                 | Extracellular |
| AIO22350.1 | peptidase                                   |                       | 0.13 | 0.12 |                                                                                                | Extracellular |
| AIO20885.1 | zinc protease                               | SACOL1298             | 0.46 | 0.44 |                                                                                                | Unknown       |
| AIO20273.1 | arginine-tRNA ligase                        | argS<br>SACOL0663     | 0.48 | 0.47 | Aminoacyl-tRNA biosynthesis                                                                    | Cytoplasmic   |
| AIO21182.1 | transcriptional regulator                   | srrA SA1323           | 0.33 | 0.32 | Two-component system                                                                           | Cytoplasmic   |
| AIO20196.1 | cysteinyl-tRNA synthetase                   | cysS<br>SACOL0576     | 0.41 | 0.40 | Aminoacyl-tRNA biosynthesis                                                                    | Cytoplasmic   |
| AIO20645.1 | glutamyl endopeptidase                      | sspA<br>SACOL1057     | 0.15 | 0.15 | Quorum sensing                                                                                 | Extracellular |
| AIO20455.1 | hypothetical protein<br>KQ76_03935          | SACOL0851             | 0.42 | 0.41 |                                                                                                | Unknown       |
| AIO22160.1 | lactate dehydrogenase                       | ldhD ddh<br>SACOL2535 | 0.29 | 0.29 | Pyruvate metabolism, Microbial<br>metabolism in diverse<br>environments                        | Cytoplasmic   |
| AIO21406.1 | Free methionine-(R)-<br>sulfoxide reductase | SACOL1768             | 0.26 | 0.25 | Cysteine and methionine<br>metabolism                                                          | Cytoplasmic   |
| AIO22099.1 | peptidase M28                               | SA2244                | 0.32 | 0.31 |                                                                                                | Cytoplasmic   |
| AIO20194.1 | glutamyl-tRNA synthetase                    | gltX SA0486           | 0.39 | 0.39 | Metabolic pathways, Aminoacyl-<br>tRNA biosynthesis                                            | Cytoplasmic   |
| AIO22275.1 | clumping factor B                           | clfB SA2423           | 0.33 | 0.33 | <i>Staphylococcus aureus</i> infection                                                         | Cellwall      |
| AIO21805.1 | uridylyltransferase                         | SA1974                | 0.36 | 0.36 |                                                                                                | Cytoplasmic   |

|            |                                    |                    |      |      |                                                                                                                                                                                                                                                                                                                                                                               |               |
|------------|------------------------------------|--------------------|------|------|-------------------------------------------------------------------------------------------------------------------------------------------------------------------------------------------------------------------------------------------------------------------------------------------------------------------------------------------------------------------------------|---------------|
| OOC93971.1 | phosphoglucomutase                 | pgcA<br>SA2279     | 0.41 | 0.41 | Metabolic pathways, Microbial metabolism in diverse environments, Biosynthesis of secondary metabolites, Biosynthesis of antibiotics, Purine metabolism, Galactose metabolism, Glycolysis / Gluconeogenesis, Glycerophospholipid metabolism, Pentose phosphate pathway, Amino sugar and nucleotide sugar metabolism, Streptomycin biosynthesis, Starch and sucrose metabolism | Cytoplasmic   |
| OOC94101.1 | DUF2648 domain-containing protein  | SACOL2649          | 0.50 | 0.51 |                                                                                                                                                                                                                                                                                                                                                                               | Unknown       |
| AIO19942.1 | peptidase M23                      | lytM<br>SACOL0263  | 0.12 | 0.12 |                                                                                                                                                                                                                                                                                                                                                                               | Extracellular |
| AIO21492.1 | hypothetical protein<br>KQ76_09365 | SACOL1852          | 0.16 | 0.16 |                                                                                                                                                                                                                                                                                                                                                                               | Unknown       |
| AIO19900.1 | nitric oxide dioxygenase           | SA0231             | 0.34 | 0.35 |                                                                                                                                                                                                                                                                                                                                                                               | Cytoplasmic   |
| AIO21508.1 | serine protease                    | spIE<br>SACOL1865  | 0.40 | 0.41 |                                                                                                                                                                                                                                                                                                                                                                               | Extracellular |
| AIO20228.1 | hydrolase                          | sdrD SA0520        | 0.22 | 0.22 | <i>Staphylococcus aureus</i> infection                                                                                                                                                                                                                                                                                                                                        | Cellwall      |
| AIO20556.1 | hypothetical protein<br>KQ76_04470 | SA0841             | 0.08 | 0.08 |                                                                                                                                                                                                                                                                                                                                                                               | CM            |
| AIO22338.1 | adhesin                            |                    | 0.46 | 0.47 |                                                                                                                                                                                                                                                                                                                                                                               | Cellwall      |
| OOC90902.1 | calcium-binding protein            | SACOL1846          | 0.05 | 0.05 |                                                                                                                                                                                                                                                                                                                                                                               | Unknown       |
| AAX11326.1 | enterotoxin type Gv precursor      | entG seg<br>SA1642 | 0.40 | 0.41 | <i>Staphylococcus aureus</i> infection                                                                                                                                                                                                                                                                                                                                        | Extracellular |
| AIO22285.1 | hypothetical protein<br>KQ76_13835 | SACOL2661          | 0.37 | 0.39 |                                                                                                                                                                                                                                                                                                                                                                               | Extracellular |

|            |                                    |                   |      |      |                                                                                                                          |               |
|------------|------------------------------------|-------------------|------|------|--------------------------------------------------------------------------------------------------------------------------|---------------|
| AIO20759.1 | fibrinogen-binding protein         | SA1004            | 0.47 | 0.50 | <i>Staphylococcus aureus</i> infection                                                                                   | Unknown       |
| AIO22081.1 | sodium:proton antiporter           | SA2228            | 0.21 | 0.22 |                                                                                                                          | CM            |
| AIO22369.1 | phosphodiesterase                  | hlb<br>SACOL2003  | 0.12 | 0.12 | Metabolic pathways, Quorum sensing, Biosynthesis of secondary metabolites                                                | Extracellular |
| AIO22017.1 | hypothetical protein KQ76_12415    | SA2168            | 0.39 | 0.42 |                                                                                                                          | Unknown       |
| AIO21033.1 | hypothetical protein KQ76_06965    | SA1242            | 0.46 | 0.49 |                                                                                                                          | Unknown       |
| AIO20783.1 | penicillin-binding protein         | pbpA              | 0.39 | 0.42 | Metabolic pathways, beta-Lactam resistance, Peptidoglycan biosynthesis                                                   | CM            |
| AIO21282.1 | competence protein ComE            | comEB             | 0.41 | 0.44 | Metabolic pathways, Pyrimidine metabolism                                                                                | Cytoplasmic   |
| AIO20229.1 | bis(5'-nucleosyl)-tetraphosphatase | sdrE<br>SACOL0610 | 0.26 | 0.28 | <i>Staphylococcus aureus</i> infection                                                                                   | Cellwall      |
| AIO21274.1 | molecular chaperone DnaK           | dnaK<br>SA1409    | 0.43 | 0.47 | RNA degradation                                                                                                          | Cytoplasmic   |
| AIO22174.1 | thioredoxin                        | SA2324            | 0.42 | 0.47 |                                                                                                                          | Cytoplasmic   |
| AIO20145.1 | DNA polymerase III subunit delta'  | SACOL0526         | 0.31 | 0.34 | Metabolic pathways, DNA replication, Pyrimidine metabolism, Purine metabolism, Homologous recombination, Mismatch repair | Cytoplasmic   |
| AIO20763.1 | alpha-hemolysin                    | SA1007            | 0.06 | 0.06 |                                                                                                                          | Extracellular |
| AIO20737.1 | phenylalanine--tRNA ligase         | pheS<br>SA0985    | 0.35 | 0.39 | Aminoacyl-tRNA biosynthesis                                                                                              | Cytoplasmic   |
| AIO21788.1 | HAD family hydrolase               | SA1957            | 0.30 | 0.34 |                                                                                                                          | Cytoplasmic   |
| AIO20874.1 | 50S ribosomal protein L7           | SA1111            | 0.34 | 0.38 |                                                                                                                          | Unknown       |

|            |                                             |                                  |      |      |                                                                    |               |
|------------|---------------------------------------------|----------------------------------|------|------|--------------------------------------------------------------------|---------------|
| AIO21867.1 | 30S ribosomal protein S14                   | rpsZ rpsN1<br>SA2034.1<br>SAS079 | 0.26 | 0.29 | Ribosome                                                           | Cytoplasmic   |
| AIO20189.1 | excinuclease ABC subunit<br>B               | SA0481                           | 0.36 | 0.40 |                                                                    | Cytoplasmic   |
| OOC92415.1 | sphingomyelin<br>phosphodiesterase          | hlb<br>SACOL2003                 | 0.33 | 0.37 | Glycerophospholipid metabolism,<br>Inositol phosphate metabolism   | Extracellular |
| AIO21275.1 | heat shock protein GrpE                     | grpE SA1410                      | 0.36 | 0.41 |                                                                    | Cytoplasmic   |
| AIO20225.1 | HAD family hydrolase                        | SA0517                           | 0.42 | 0.48 |                                                                    | Cytoplasmic   |
| AIO20637.1 | acetyltransferase                           | SA0893                           | 0.17 | 0.20 |                                                                    | Cytoplasmic   |
| AIO22130.1 | DNA mismatch repair<br>protein MutT         | SACOL2500                        | 0.41 | 0.47 |                                                                    | Unknown       |
| AIO20418.1 | ABC transporter                             | SACOL0811                        | 0.27 | 0.31 |                                                                    | Cytoplasmic   |
| AIO21842.1 | toxin                                       | SACOL2197                        | 0.40 | 0.46 |                                                                    | CM            |
| AIO22387.1 | replication-associated<br>protein (plasmid) | SAP031                           | 0.41 | 0.48 |                                                                    | Unknown       |
| AIO20884.1 | zinc protease                               | SA1121                           | 0.29 | 0.34 |                                                                    | Cytoplasmic   |
| AIO22136.1 | fibronectin-binding protein                 | fnbA<br>SA2291                   | 0.23 | 0.26 | Bacterial invasion of epithelial<br>cells                          | Cellwall      |
| AIO20222.1 | deoxycytidine kinase                        | SA0514                           | 0.43 | 0.50 | Metabolic pathways, Purine<br>metabolism, Pyrimidine<br>metabolism | Cytoplasmic   |
| AIO21273.1 | molecular chaperone DnaJ                    | dnaJ SA1408                      | 0.21 | 0.24 |                                                                    | Cytoplasmic   |
| AIO22207.1 | transglycosylase                            | isaA<br>SACOL2584                | 0.11 | 0.14 |                                                                    | Extracellular |

|            |                                                |                     |      |      |                                                                                                            |               |
|------------|------------------------------------------------|---------------------|------|------|------------------------------------------------------------------------------------------------------------|---------------|
| AIO19907.1 | PTS sugar transporter subunit IIA              | SA0236              | 0.24 | 0.29 | Metabolic pathways, Galactose metabolism, Phosphotransferase system (PTS)                                  | Cytoplasmic   |
| AIO20259.1 | dihydrolipoamide dehydrogenase                 | SA0551              | 0.42 | 0.51 |                                                                                                            | Cytoplasmic   |
| AIO21343.1 | membrane protein                               | SA1476              | 0.30 | 0.37 |                                                                                                            | Unknown       |
| AIO20071.1 | NADPH-dependent oxidoreductase                 | nfrA<br>SACOL0453   | 0.26 | 0.32 | Metabolic pathways, Riboflavin metabolism                                                                  | Cytoplasmic   |
| AIO21601.1 | cysteine protease                              | sspP scpA<br>SA1725 | 0.23 | 0.29 |                                                                                                            | Extracellular |
| AIO20406.1 | iron ABC transporter substrate-binding protein | SA0691              | 0.35 | 0.44 | ABC transporters                                                                                           | CM            |
| AIO20716.1 | SCP-like extracellular protein                 | SA0967              | 0.17 | 0.22 |                                                                                                            | Unknown       |
| AIO21889.1 | hypothetical protein KQ76_11750                | SAS081              | 0.34 | 0.44 |                                                                                                            | Cytoplasmic   |
| AIO21919.1 | urease subunit gamma                           | ureA<br>SA2082      | 0.35 | 0.45 | Metabolic pathways, Microbial metabolism in diverse environments, Purine metabolism, Arginine biosynthesis | Cytoplasmic   |
| AIO19988.1 | alpha/beta hydrolase                           | SACOL0391           | 0.32 | 0.42 |                                                                                                            | Cytoplasmic   |
| AIO22336.1 | pyrrolidone-carboxylate peptidase              | pcp<br>SACOL2714    | 0.32 | 0.41 |                                                                                                            | Cytoplasmic   |
| AIO22042.1 | glutathione S-transferase                      | SACOL2402           | 0.29 | 0.40 |                                                                                                            | Unknown       |
| AIO21116.1 | gamma-hemolysin subunit A                      | hlgC SA2208         | 0.35 | 0.48 |                                                                                                            | Extracellular |

|            |                         |             |      |      |                                                                                                                                                                                                                                                     |               |
|------------|-------------------------|-------------|------|------|-----------------------------------------------------------------------------------------------------------------------------------------------------------------------------------------------------------------------------------------------------|---------------|
| AIO22074.1 | glycerate kinase        | SA2220      | 0.24 | 0.34 | Metabolic pathways, Microbial metabolism in diverse environments, Biosynthesis of antibiotics, Glycerolipid metabolism, lyoxylate and dicarboxylate metabolism, Glycine, serine and threonine metabolism                                            | Cytoplasmic   |
| AIO21505.1 | serine protease         | spIF SA1627 | 0.25 | 0.35 | Quorum sensing                                                                                                                                                                                                                                      | Extracellular |
| AIO20749.1 | succinate dehydrogenase | sdhB        | 0.28 | 0.41 | Metabolic pathways, Microbial metabolism in diverse environments, Biosynthesis of secondary metabolites, Biosynthesis of antibiotics, Carbon metabolism, Citrate cycle (TCA cycle), Butanoate metabolism, Oxidative phosphorylation                 | Cytoplasmic   |
| AIO21157.1 | replication protein     |             | 0.31 | 0.47 |                                                                                                                                                                                                                                                     | Cytoplasmic   |
| AIO21221.1 | acetyl-CoA carboxylase  | accB        | 0.23 | 0.40 | Metabolic pathways, Microbial metabolism in diverse environments, Biosynthesis of secondary metabolites, Biosynthesis of antibiotics, Carbon metabolism, Fatty acid metabolism, Propanoate metabolism, Pyruvate metabolism, Fatty acid biosynthesis | Cytoplasmic   |



**Table S3:** The list of significantly upregulated proteins in hydrated biofilm in comparison to DSB (p<0.05). \* CM denotes Cytoplasmic Membrane.

| Accession ID | Protein Name                     | Gene Name   | Fold Change | Protein Pathways                              | Subcellular Localization |
|--------------|----------------------------------|-------------|-------------|-----------------------------------------------|--------------------------|
| AIO21660.1   | DNA-binding protein              |             | 2.968       |                                               | Cytoplasmic              |
| AIO20800.1   | phosphoribosyl transferase       | pyrR SA1041 | 2.527       | Metabolic pathways, Pyrimidine metabolism     | Cytoplasmic              |
| AIO22003.1   | L-lactate permease               | SACOL2363   | 2.495       |                                               | CM*                      |
| AIO20486.1   | hypothetical protein KQ76_04110  | SA0772      | 2.359       |                                               | Unknown                  |
| AIO21982.1   | hypothetical protein KQ76_12230  | SACOL2344   | 2.319       |                                               | Cytoplasmic              |
| AIO20657.1   | cytochrome C oxidase subunit III | qoxC SA0911 | 2.312       | Metabolic pathways, Oxidative phosphorylation | CM                       |
| AIO22274.1   | tributylin esterase              | SA2422      | 2.304       |                                               | Unknown                  |
| AIO21564.1   | general stress protein           | SA1692      | 2.294       |                                               | Cytoplasmic              |

|            |                                                    |                |       |                                                                                                                                                                             |             |
|------------|----------------------------------------------------|----------------|-------|-----------------------------------------------------------------------------------------------------------------------------------------------------------------------------|-------------|
| AIO20599.1 | peptide chain release factor 3                     | prfC SACOL1025 | 2.272 |                                                                                                                                                                             | Cytoplasmic |
| AIO20680.1 | hypothetical protein KQ76_05130                    | SA0933         | 2.177 |                                                                                                                                                                             | Unknown     |
| AIO21790.1 | glucosamine--fructose-6-phosphate aminotransferase | glmS SACOL2145 | 2.130 | Metabolic pathways, Biosynthesis of antibiotics, Alanine, aspartate and glutamate metabolism, Amino sugar and nucleotide sugar metabolism                                   | Cytoplasmic |
| AIO21830.1 | galactose-6-phosphate isomerase                    | lacA SA1997    | 2.127 | Metabolic pathways, Galactose metabolism                                                                                                                                    | Unknown     |
| AIO22037.1 | nitrite reductase                                  | nasD           | 2.078 | Microbial metabolism in diverse environments, Nitrogen metabolism                                                                                                           | Cytoplasmic |
| AIO21798.1 | arginase                                           | arg SA1968     | 2.039 | Metabolic pathways, Biosynthesis of secondary metabolites, Biosynthesis of antibiotics, Biosynthesis of amino acids, Arginine biosynthesis, Arginine and proline metabolism | Cytoplasmic |

|            |                                                        |                     |       |                                                                                                                                                                                                           |             |
|------------|--------------------------------------------------------|---------------------|-------|-----------------------------------------------------------------------------------------------------------------------------------------------------------------------------------------------------------|-------------|
| AIO20370.1 | transporter associated domain protein                  | SA0657              | 2.038 |                                                                                                                                                                                                           | CM          |
| AIO21892.1 | aminoacyltransferase                                   | femX fmhB<br>SA2057 | 2.026 | Metabolic pathways,<br>Peptidoglycan biosynthesis                                                                                                                                                         | Cytoplasmic |
| AIO21786.1 | lytic regulatory protein                               | truncated-SA        | 2.024 |                                                                                                                                                                                                           | CM          |
| OOC91313.1 | 5-<br>(carboxyamino)imidazole<br>ribonucleotide mutase | purE SA0916         | 2.007 | Metabolic pathways, Biosynthesis<br>of secondary metabolites,<br>Biosynthesis of antibiotics, Purine<br>metabolism                                                                                        | CM          |
| AIO20536.1 | argininosuccinate<br>synthase                          | argG SA0822         | 2.006 | Metabolic pathways, Biosynthesis<br>of secondary metabolites,<br>Biosynthesis of antibiotics,<br>Biosynthesis of amino acids,<br>Arginine biosynthesis, Alanine,<br>aspartate and glutamate<br>metabolism | Cytoplasmic |

|            |                    |                |       |                                                                                                                                                                                                       |             |
|------------|--------------------|----------------|-------|-------------------------------------------------------------------------------------------------------------------------------------------------------------------------------------------------------|-------------|
| AIO20949.1 | threonine synthase | thrC SACOL1363 | 2.004 | Metabolic pathways, Biosynthesis of secondary metabolites, Microbial metabolism in diverse environments, Glycine, serine and threonine metabolism, Vitamin B6 metabolism, Biosynthesis of amino acids | Cytoplasmic |
|------------|--------------------|----------------|-------|-------------------------------------------------------------------------------------------------------------------------------------------------------------------------------------------------------|-------------|

**Table S4:** The list of significantly upregulated proteins in DSB in comparison to hydrated biofilm (p<0.05). \* CM denotes Cytoplasmic Membrane.

| Accession ID | Protein Name                         | Gene Name         | Fold Change | Protein Pathways                                                                                                                                                                                               | Subcellular Localization |
|--------------|--------------------------------------|-------------------|-------------|----------------------------------------------------------------------------------------------------------------------------------------------------------------------------------------------------------------|--------------------------|
| OOC91425.1   | serine acetyltransferase             | cysE<br>SA0487    | 2.322       | Metabolic pathways, Microbial metabolism in diverse environments, Biosynthesis of secondary metabolites, Cysteine and methionine metabolism, Sulfur metabolism, Biosynthesis of amino acids, Carbon metabolism | Cytoplasmic              |
| AIO21414.1   | PTS glucose transporter subunit IIBC | ptaA              | 2.318       | Amino sugar and nucleotide sugar metabolism, Phosphotransferase system (PTS)                                                                                                                                   | CM*                      |
| AIO21824.1   | 6-phospho-beta-galactosidase         | lacG<br>SA1991    | 2.196       | Metabolic pathways, Galactose metabolism                                                                                                                                                                       | Cytoplasmic              |
| AIO21431.1   | UDP-N-acetylmuramate--alanine ligase | murC<br>SACOL1790 | 2.174       | Metabolic pathways, D-Glutamine and D-glutamate metabolism, Peptidoglycan biosynthesis                                                                                                                         | Cytoplasmic              |

|            |                                               |                |       |                                                                                                            |             |
|------------|-----------------------------------------------|----------------|-------|------------------------------------------------------------------------------------------------------------|-------------|
| AIO20705.1 | inositol monophosphatase                      | SACOL1116      | 2.128 | Metabolic pathways, Streptomycin biosynthesis, Inositol phosphate metabolism                               | Cytoplasmic |
| AIO20408.1 | UDP-N-acetylenolpyruvoylglucosamine reductase | murB<br>SA0693 | 2.122 | Metabolic pathways, Amino sugar and nucleotide sugar metabolism, Peptidoglycan biosynthesis                | Cytoplasmic |
| AIO22036.1 | nitrite reductase                             | nasE           | 2.091 | Microbial metabolism in diverse environments, Nitrogen metabolism                                          | Cytoplasmic |
| AIO20589.1 | enoyl-ACP reductase                           | fabI           | 2.086 | Metabolic pathways, Biotin metabolism, Fatty acid biosynthesis and metabolism, Biosynthesis of antibiotics | CM          |
| AIO20891.1 | recombinase RecA                              | recA<br>SA1128 | 2.036 | Homologous recombination                                                                                   | Cytoplasmic |
| AIO20673.1 | phosphoribosylamine-glycine ligase            | purD<br>SA0926 | 2.011 | Metabolic pathways, Biosynthesis of secondary metabolites, Biosynthesis of antibiotics, Purine metabolism  | Cytoplasmic |

**Table S5:** The list of significantly downregulated proteins in hydrated biofilm in comparison to DSB (p<0.05). \* CM denotes Cytoplasmic Membrane.

| Accession ID | Protein Name                              | Gene Name   | Fold Change | Protein Pathways | Subcellular Localization |
|--------------|-------------------------------------------|-------------|-------------|------------------|--------------------------|
| AIO22143.1   | hypothetical protein KQ76_13105           | SACOL2519   | 0.303       |                  | Cytoplasmic              |
| AIO20170.1   | hypothetical protein KQ76_02355           | SA0464      | 0.427       |                  | Cytoplasmic              |
| OOC90925.1   | serine protease splA                      | splB SA1630 | 0.431       |                  | Cytoplasmic              |
| AIO19949.1   | type VII secretion protein EsaA           | esaA SA0272 | 0.432       |                  | CM*                      |
| AIO21302.1   | transcription elongation factor GreA      | greA SA1438 | 0.435       |                  | Cytoplasmic              |
| AIO20865.1   | ribosome recycling factor                 | frr SA1102  | 0.435       |                  | Cytoplasmic              |
| AIO21853.1   | 50S ribosomal protein L17                 | rplQ SA2022 | 0.436       | Ribosome         | Cytoplasmic              |
| AIO21993.1   | hemin ABC transporter ATP-binding protein | hrtA SA2149 | 0.448       | ABC transporters | CM                       |

|            |                                                               |                     |       |                                                                                           |             |
|------------|---------------------------------------------------------------|---------------------|-------|-------------------------------------------------------------------------------------------|-------------|
| AIO20742.1 | DNA polymerase                                                | SA0990              | 0.451 |                                                                                           | Cytoplasmic |
| AIO19898.1 | uroporphyrin-III<br>methyltransferase                         | SA0230              | 0.453 |                                                                                           | Unknown     |
| AIO20835.1 | acyl carrier protein                                          | acpP hmrB<br>SA1075 | 0.473 |                                                                                           | Cytoplasmic |
| AIO20893.1 | hypothetical protein<br>KQ76_06215                            | SACOL1306           | 0.480 |                                                                                           | Cytoplasmic |
| AIO20478.1 | thioredoxin                                                   | SA0758              | 0.484 |                                                                                           | Cytoplasmic |
| AIO22260.1 | sulfite reductase [NADPH]<br>flavoprotein alpha-<br>component | SA2413              | 0.486 | Metabolic pathways, Microbial<br>metabolism in diverse environments,<br>Sulfur metabolism | CM          |
| AIO20838.1 | cell division protein FtsY                                    | ftsY<br>SACOL1251   | 0.486 | Protein export, Bacterial secretion<br>system, Quorum sensing                             | CM          |
| AIO19963.1 | QueA protein                                                  | SACOL0282           | 0.489 |                                                                                           | Cytoplasmic |
| AIO20555.1 | phosphatidylethanolamine-<br>binding protein                  | SACOL0984           | 0.491 |                                                                                           | Unknown     |
| AIO20584.1 | GTP pyrophosphokinase                                         | SA0864              | 0.496 | Purine metabolism                                                                         | Cytoplasmic |



|            |                                                             |           |       |                  |             |
|------------|-------------------------------------------------------------|-----------|-------|------------------|-------------|
| AIO20515.1 | hypothetical protein<br>KQ76_04260                          | SACOL0943 | 0.497 |                  | Cytoplasmic |
| AIO21475.1 | glyoxal reductase                                           | SA1606    | 0.499 |                  | Cytoplasmic |
| AIO20687.1 | hypothetical protein<br>KQ76_05170                          | SA0941    | 0.501 |                  | Cytoplasmic |
| AIO21223.1 | peptidase M24                                               | SACOL1588 | 0.505 |                  | Cytoplasmic |
| AIO22050.1 | amino acid ABC<br>transporter substrate-<br>binding protein | SACOL2412 | 0.508 | ABC transporters | Unknown     |
| AIO21432.1 | cell division protein FtsK                                  | SA1562    | 0.510 |                  | CM          |

**Table S6:** The list of significantly downregulated proteins in DSB in comparison to hydrated biofilm (p<0.05). \* CM denotes Cytoplasmic Membrane.

| <b>Accession ID</b> | <b>Protein Name</b>                          | <b>Gene Name</b> | <b>Fold Change</b> | <b>Protein Pathways</b> | <b>Subcellular Localization</b> |
|---------------------|----------------------------------------------|------------------|--------------------|-------------------------|---------------------------------|
| AIO20286.1          | recombinase                                  | SA0577           | 0.388              |                         | Cytoplasmic                     |
| AIO20702.1          | membrane protein                             | SACOL1113        | 0.409              |                         | CM*                             |
| AIO21531.1          | 3'-5' exonuclease                            | cbf1             | 0.441              |                         | Cytoplasmic                     |
| AIO20231.1          | glycosyl transferase family 1                | SACOL0612        | 0.463              |                         | Cytoplasmic                     |
| AIO21551.1          | thiol peroxidase                             | SA1680           | 0.467              |                         | Cell-wall                       |
| AIO20579.1          | oligopeptidase PepB                          | SA0859           | 0.477              |                         | Cytoplasmic                     |
| AIO21461.1          | pyridine nucleotide-disulfide oxidoreductase | SACOL1821        | 0.493              |                         | Cytoplasmic                     |
| AIO20197.1          | ribonuclease III                             | mrnC<br>SA0489   | 0.496              |                         | Cytoplasmic                     |

|            |                                            |           |       |                                   |             |
|------------|--------------------------------------------|-----------|-------|-----------------------------------|-------------|
| AIO21408.1 | glycerophosphodiester<br>phosphodiesterase | SACOL1770 | 0.497 | Glycerophospholipid<br>metabolism | Cytoplasmic |
| AIO21699.1 | RNA polymerase<br>sigma factor SigB        | sigB      | 0.509 |                                   | Cytoplasmic |
| AIO20740.1 | cell division protein<br>ZapA              | SA0988    | 0.509 |                                   | Cytoplasmic |

**Table S7:** Relative correlation of selected qPCR gene expression data to TMT protein expression data (exclusive and common) in hydrated biofilm and DSB compared with planktonic. \*FC denotes fold change.

| Accession ID | Protein Name                                  | Gene Name   | TMT                    |           | RT-qPCR                |           |
|--------------|-----------------------------------------------|-------------|------------------------|-----------|------------------------|-----------|
|              |                                               |             | Hydrated biofilm (FC)* | DSB (FC)* | Hydrated biofilm (FC)* | DSB (FC)* |
| AIO21431.1   | UDP-N-acetylmuramate--alanine ligase          | <i>MurC</i> |                        | 2.174     |                        | 0.206     |
| AIO20408.1   | UDP-N-acetylenolpyruvoylglucosamine reductase | <i>MurB</i> |                        | 2.122     |                        | 0.668     |
| AIO20645.1   | glutamyl endopeptidase                        | <i>SspA</i> | 0.149                  | 0.144     | 0.104                  | 0.083     |
| AIO20163.1   | ribose-phosphate pyrophosphokinase            | <i>Prs</i>  | 2.814                  | 2.785     | 3.94                   | 0.632     |
| AIO20712.1   | pyruvate carboxylase                          | <i>Pyc</i>  |                        | 0.448     |                        | 0.837     |
| AIO20749.1   | Succinate dehydrogenase                       | <i>SdhB</i> | 0.283                  | 0.406     | 3.30                   | 1.313     |

**Table S8:** Primers used in this study

| <b>Gene name</b> | <b>Primer name</b> | <b>Primer sequence (5'-3')</b> | <b>Position in gene</b> | <b>PCR (bp)</b> | <b>size</b> | <b>Ta (°C)</b> |
|------------------|--------------------|--------------------------------|-------------------------|-----------------|-------------|----------------|
| <i>16s rRNA</i>  | Staphy_16sF        | GGCGAAGGCGRCTTTCTGG            | 704-720                 | 95bp            |             | 55             |
|                  | Staphy_16sR        | CGTTTACGGCGTGGACT              | 782-798                 |                 |             |                |
| <i>MucC</i>      | murC F             | TAATTGGTGATGGCACAGG            | 395-506                 | 112             |             | 50             |
|                  | murC R             | GTCATAATTGCGTAATCAGG           |                         |                 |             |                |
| <i>MurB</i>      | murB F             | AGGTGGTAATGCCGACTTT            | 99-253                  | 155             |             | 55             |
|                  | murB R             | TAATTACAATGCCGCGAATA           |                         |                 |             |                |
| <i>SspA</i>      | sspA F             | CAGCGACACTTGTGAGTTC            | 53-130                  | 109             |             | 55             |
|                  | sspA R             | TCTGCGTTTGTGTGGAT              |                         |                 |             |                |
| <i>Prs</i>       | prs F              | TCAGGACCGGCTAAAGAAC            | 784-918                 | 55              |             | 55             |
|                  | prs R              | AGCTTGTGCGATTAAACCAG           |                         |                 |             |                |

|             |        |                      |         |    |    |
|-------------|--------|----------------------|---------|----|----|
| <i>Pyc</i>  | pyc F  | TCGTACAACGGCTATCAAGG |         |    |    |
|             | pyc R  | AATCATTAGCGGGAAACCAG | 366-480 | 60 | 60 |
| <i>SdhB</i> | sdhB F | GCCACGTATGCCAGAGAAA  |         |    |    |
|             | sdhB R | CGAACTTGCGAGATTGCTT  | 462-599 | 60 | 60 |

---
